# Supplementary material for: Mirror-like Bright Al-Mn Coatings Electrodeposition from 1-Ethyl-3 Methylimidazolium Chloride-AlCl3-MnCl2 Ionic Liquids with Pyridine Derivatives
Source: MDPI journal article supplement (doi:10.3390/ma14206226), 2021-10-19
Supplement: s1 [file s1]

## Supporting Information

# Mirror-like Bright Al-Mn Coatings Electrodeposition from 1-Ethyl-3 Methylimidazolium Chloride-AlCl<sub>3</sub>-MnCl<sub>2</sub> Ionic Liquids with Pyridine Derivatives

Dong Peng <sup>1</sup>, Da Long Cong <sup>1</sup>, Kai Qiang Song <sup>1</sup>, Xing Xing Ding <sup>1</sup>, Xuan Wang <sup>1</sup>, Yi Xin Bai <sup>1</sup>, Xin Rui Yang <sup>1</sup>, Chang Qing Yin <sup>2</sup>, Yu Xin Zhang <sup>2</sup>, Jin Song Rao <sup>2</sup>, Min Zhang <sup>1,\*</sup> and Zhong Sheng Li <sup>1,\*</sup>

<sup>1</sup> Southwest Institute of Technology and Engineering, Chongqing 400039, P.R China; pd2019@126.com (D.P.); congdl09@163.com (D.C); scut\_song@163.com (K.S.); sc126789@gmail.com (X.D.); xuan123\_wang@sina.com (X.W.); bitbyx@163.com (Y.B); yxr67938543@163.com (X.Y.)

<sup>2</sup> College of Material Science and Engineering, Chongqing University, Chongqing 400044, P.R China; 2972513971@qq.com (C.Y.); zhangyuxin@cqu.edu.cn (Y.Z.); rjs@cqu.edu.cn (J.R.)

\* Correspondence: (M.Z.); zhongshli@163.com (Z.L.); Tel.: +86-23-68792314

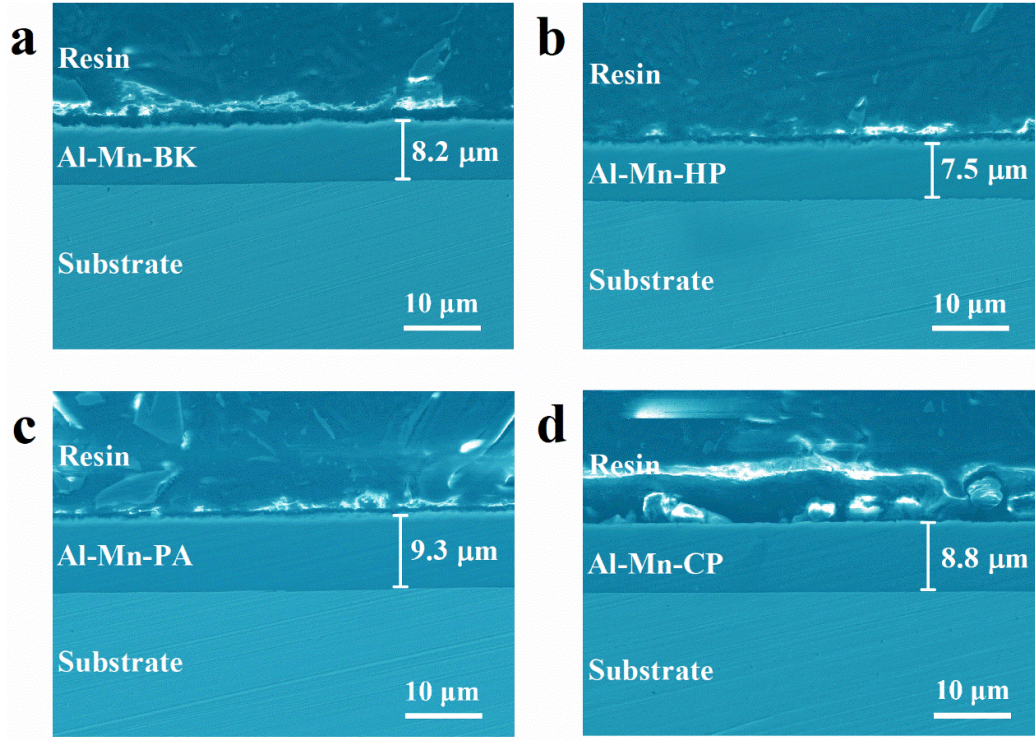

**Figure S1.** Cross-section morphology of the (a) Al-Mn-BK, (b) Al-Mn-HP, (c) Al-Mn-PA, and (d) Al-Mn-CP coatings.

The preferred orientation of various Al-Mn coatings was determined at the quantitative level by the determination of “Texture Coefficient” ( $TC(hkl)$ ) and “Relative Texture Coefficient” ( $RTC(hkl)$ ) using the reagent grade fine aluminum powder as the reference sample [1,2].

$$R_1(hkl) = \frac{I(hkl)_s}{\sum I(hkl)_s} \times 100 \quad (1)$$

where  $I(hkl)_s$  is the intensity of the  $(hkl)$  reflection, and  $\sum I(hkl)_s$  is the sum of all intensities of all the reflections monitored.  $S$  refers to the investigated sample.

$$R_2(hkl) = \frac{I(hkl)_p}{\sum I(hkl)_p} \times 100 \quad (2)$$

The subscript  $P$  represents the reference sample.

$$TC(hkl) = \frac{R_1(hkl)}{R_2(hkl)} \quad (3)$$

A value of  $TC(hkl)$  greater than 1 indicates a preferred orientation of the  $(hkl)$  reflection compared with the random distribution of grains in the reference sample.

$$RTC(hkl) = \frac{TC(hkl)}{\sum TC(hkl)} \quad (4)$$

The  $RTC(hkl)$  coefficient expresses the intensity of a given orientation  $(hkl)$  relative to reference

sample, as a percentage of the intensity of all orientations parallel to the surface of the investigated sample.

**Table S1.** Texture calculations for various Al-Mn coatings obtained from the XRD patterns in Fig. 4.

|                   |          | Plane ( <i>hkl</i> ) |         |         |         | $\Sigma I$ |
|-------------------|----------|----------------------|---------|---------|---------|------------|
|                   |          | (111)                | (200)   | (220)   | (311)   |            |
| Intensity         | Al       | 1247850              | 1289499 | 556051  | 567645  | 3661045    |
|                   | Al-Mn-BK | 973                  | 4648    | 3512    | 207     | 9340       |
|                   | Al-Mn-HP | 1335                 | 14546   | 1276    | 105     | 17261      |
|                   | Al-Mn-PA | 761                  | 94784   | 0       | 0       | 95545      |
|                   | Al-Mn-CP | 656                  | 105962  | 0       | 0       | 106618     |
| $R_i\%$           | Al-Mn-BK | 10.4164              | 49.7660 | 37.5982 | 2.2194  |            |
|                   | Al-Mn-HP | 7.7326               | 84.2693 | 7.3922  | 0.6059  |            |
|                   | Al-Mn-PA | 0.7965               | 99.2034 | 0.0     | 0.0     |            |
|                   | Al-Mn-CP | 0.62                 | 99.38   | 0.0     | 0.0     |            |
| $R_z\%$           | Al       | 34.0845              | 35.2221 | 15.183  | 15.5050 |            |
| $TC(hkl)$         | Al-Mn-BK | 0.3056               | 1.4129  | 2.4754  | 0.1431  |            |
|                   | Al-Mn-HP | 0.2269               | 2.3925  | 0.4867  | 0.0391  |            |
|                   | Al-Mn-PA | 0.0234               | 2.8165  | 0.0     | 0.0     |            |
|                   | Al-Mn-CP | 0.0180               | 2.8217  | 0.0     | 0.0     |            |
| $RTC(hkl)$<br>(%) | Al-Mn-BK | 7.0463               | 32.5772 | 57.0762 | 3.3004  |            |
|                   | Al-Mn-HP | 7.2132               | 76.0696 | 15.4747 | 1.2425  |            |
|                   | Al-Mn-PA | 0.8229               | 99.1771 | 0.0     | 0.0     |            |
|                   | Al-Mn-CP | 0.6354               | 99.3646 | 0.0     | 0.0     |            |

**Table S2.** Average roughness of Al-Mn coatings.

| Materials              | Al-Mn-BK | Al-Mn-HP | Al-Mn-PA | Al-Mn-CP |
|------------------------|----------|----------|----------|----------|
| Average roughness (nm) | 243      | 239      | 76       | 18       |

## References

1. Berube, L.P.; Esperance, G.L. A quantitative method of determining of the degree of texture of zinc electrodeposits. *Journal of The Electrochemical Society* 1989, 136, 2314–2315.
2. Yang, J.; Chang, L.; Jiang, L.; Wang, K.; Huang, L.; He, Z.; Shao, H.; Wang, J.; Cao, C.N. Electrodeposition of Al-Mn-Zr ternary alloy films from the Lewis acidic aluminum chloride-1-ethyl-3-methylimidazolium chloride ionic liquid and their corrosion properties. *Surface and Coatings Technology* **2017**, 321, 45-51.
